# Supplementary material for: Right Ventricular Systolic Pressure Trajectory as a Predictor of Hospitalization and Mortality in Patients With Chronic Heart Failure
Source: PubMed Central journal article supplement — CJC Open. 2023 Jun 3;5(9):671–9. doi: 10.1016/j.cjco.2023.05.011 (PMC10516718; doi:10.1016/j.cjco.2023.05.011), 2023-06-03
Supplement: mmc1.pdf [file mmc1.pdf]

## SUPPLEMENTARY MATERIAL

**Supplemental Table S1: Associations with the secondary outcome**

|                             | All-Cause Mortality  |           | Heart Failure Hospitalization |           |
|-----------------------------|----------------------|-----------|-------------------------------|-----------|
|                             | Adjusted HR (95% CI) | p-value   | Adjusted subHR(95% CI)        | p-value   |
| <b>RVSP Category</b>        |                      |           |                               |           |
| <40 mmHg                    | Reference            | Reference | Reference                     | Reference |
| 40-49 mmHg                  | 1.21 (0.98 – 1.50)   | 0.077     | 1.50 (1.13 – 2.01)            | 0.006     |
| 50-59 mm Hg                 | 1.69 (1.35 – 2.10)   | <0.001    | 1.59 (1.16 – 2.16)            | 0.003     |
| >=60 mmHg                   | 2.13 (1.67 – 2.72)   | <0.001    | 1.88 (1.34 – 2.64)            | <0.001    |
| <b>RVSP Category Change</b> |                      |           |                               |           |
| Persistently Normal         | Reference            | Reference | Reference                     | Reference |
| Improving RVSP              | 1.36 (1.12 – 1.66)   | 0.002     | 1.32 (1.01 – 1.73)            | 0.043     |
| Worsening RVSP              | 1.12 (0.86 – 1.46)   | 0.409     | 1.29 (0.90 – 1.85)            | 0.162     |
| Persistently Abnormal       | 1.15 (0.88 – 1.51)   | 0.309     | 1.18 (0.81 – 1.71)            | 0.389     |

Supplemental Table S1: Associations with the secondary outcomes. The full multivariable model from Figure 4 was used for this analysis. CI – confidence interval, HR – hazard ratio, RVSP – right ventricular systolic pressure, subHR – subdistribution hazard ratio.

**Supplemental Table S2: Associations with the primary outcome**

|                             | Patients with HFrEF  |           | Patients without HFrEF |           |
|-----------------------------|----------------------|-----------|------------------------|-----------|
|                             | Adjusted HR (95% CI) | p-value   | Adjusted HR(95% CI)    | p-value   |
| <b>RVSP Category</b>        |                      |           |                        |           |
| <40 mmHg                    | Reference            | Reference | Reference              | Reference |
| 40-49 mmHg                  | 1.24 (0.90 – 1.70)   | 0.184     | 1.33 (1.11 – 1.59)     | 0.002     |
| 50-59 mm Hg                 | 1.43 (1.02 – 2.00)   | 0.041     | 1.61 (1.32 – 1.95)     | <0.001    |
| >=60 mmHg                   | 1.72 (1.18 – 2.50)   | 0.004     | 1.98 (1.60 – 2.45)     | <0.001    |
| <b>RVSP Category Change</b> |                      |           |                        |           |
| Persistently Normal         | Reference            | Reference | Reference              | Reference |
| Improving RVSP              | 1.33 (1.01 – 1.75)   | 0.043     | 1.11 (0.95 – 1.31)     | 0.196     |
| Worsening RVSP              | 1.47 (1.00 – 2.17)   | 0.048     | 0.95 (0.76 – 1.19)     | 0.671     |
| Persistently Abnormal       | 1.24 (0.83 – 1.85)   | 0.295     | 0.97 (0.77 – 1.23)     | 0.821     |

Supplemental Table S2: Associations with the primary outcome in patients with and without heart failure with reduced ejection fraction (HFrEF). The full multivariable model from Figure 4 was used for this analysis with the exception of heart failure category since it defined the categories. CI – confidence interval, HR – hazard ratio, RVSP – right ventricular systolic pressure.
